# Supplementary material for: Engineering multiscale hollow core–shell nanostructures via in situ surface functionalization for advanced electrochemical energy storage applications
Source: Royal Society of Chemistry journal article supplement (doi:10.1039/d5qi01541c), 2025-10-11
Supplement: d5qi01541c1.pdf [file d5qi01541c1.pdf]

# Engineering multiscale hollow core-shell nanostructures via in-situ surface functionalization for advanced electrochemical energy storage applications

Wang Yan<sup>a</sup>, Wang Hanbo<sup>a</sup>, Xu Yahui<sup>a</sup>, Zhu Dongyu<sup>a</sup>, Wang Ziming<sup>a</sup>, Li Yiduo<sup>a,d</sup>, Tian Yumei<sup>a\*</sup>, Lu Haiyan<sup>a,b,c\*</sup>

<sup>a</sup> College of Chemistry, Jilin University, Changchun, 130012, People's Republic of China.

<sup>b</sup> College of Chemistry, State Key Laboratory of Inorganic Synthesis and Preparative Chemistry, Key Laboratory of Physics and Technology for Advanced Batteries, Ministry of Education, Jilin University, Changchun 130012, PR China.

<sup>c</sup> Advanced Energy Systems and Intelligent Detection Technological Innovation University Enterprise Joint Laboratory of Jilin Province, PR China.

<sup>d</sup> College of Instrumentation and Electrical Engineering, Jilin University, Changchun, 130021, China.

\* Indicates co-corresponding author.

## Materials and instruments

The following chemical reagents and materials were employed in the course of this investigation. Cobalt nitrate ( $\text{Co}(\text{NO}_3)_2 \cdot 6\text{H}_2\text{O}$ , 99.9 %), nickel nitrate ( $\text{Ni}(\text{NO}_3)_2 \cdot 6\text{H}_2\text{O}$ , 98 %), 2-methylimidazole ( $\text{C}_4\text{H}_6\text{N}_2$ , 98 %), tannic acid ( $\text{C}_{76}\text{H}_{52}\text{O}_{46}$ , ACS), cetyltrimethylammonium bromide (CTAB, 99 %), ammonium fluoride ( $\text{NH}_4\text{F}$ , 99.5 %), activated carbon (AC), acetylene carbon black (99.95 %), and polytetrafluoroethylene (PTFE) were purchased from Shanghai Aladdin Biochemical Technology Co., Ltd, China. Ethyl alcohol ( $\text{C}_2\text{H}_5\text{OH}$ , 99.8 %), ammonium hydroxide (30 %), and potassium hydroxide (KOH, 98 %) were sourced from Beijing Chemical Works. All chemical reagents were used as received without further purification. Throughout the entire experiment, ultrapure water (resistivity of 18.25  $\text{M}\Omega \text{ cm}$ ) was employed as the solvent for all chemical reagents.

Scanning electron microscopy (SEM) analysis was conducted using a HITACHI SU020 microscope operating at 3 kV. Transmission electron microscopy (TEM) imaging was performed utilizing a Philips

FEI Tecnai G2S-Twin microscope equipped with a field emission gun, operating at 200 kV. The phase structures of the samples were characterized by X-ray diffraction (XRD) using a Rigaku X-ray diffractometer with  $\text{Cu K}\alpha$  radiation ( $\lambda = 1.54178 \text{ \AA}$ ) at 50.0 kV and 200.0 mA. The diffraction data were recorded in the  $2\theta$  range of  $5\text{--}80^\circ$  with a scan rate of  $5^\circ \text{ min}^{-1}$ . Fourier transform infrared (FT-IR) spectra were recorded on a Nicolet 400 Fourier transform infrared spectrometer. Raman analysis was conducted using a Horiba LabRAM HR Evolution spectrometer, with laser excitation at 532 nm. Nitrogen physisorption tests were carried out at 77 K using a Quantachrome Autosorb-IQ-Mplxq instrument. X-ray photoelectron spectra (XPS) were recorded on a Thermo Fisher Scientific ESCALAB 250Xi unit with  $\text{Al-K}\alpha$  (1486.6 eV) as the X-ray source. For electrochemical measurement, a CHI660E electrochemical workstation (Shanghai, Chenhua) equipped with a conventional three-electrode system was employed.

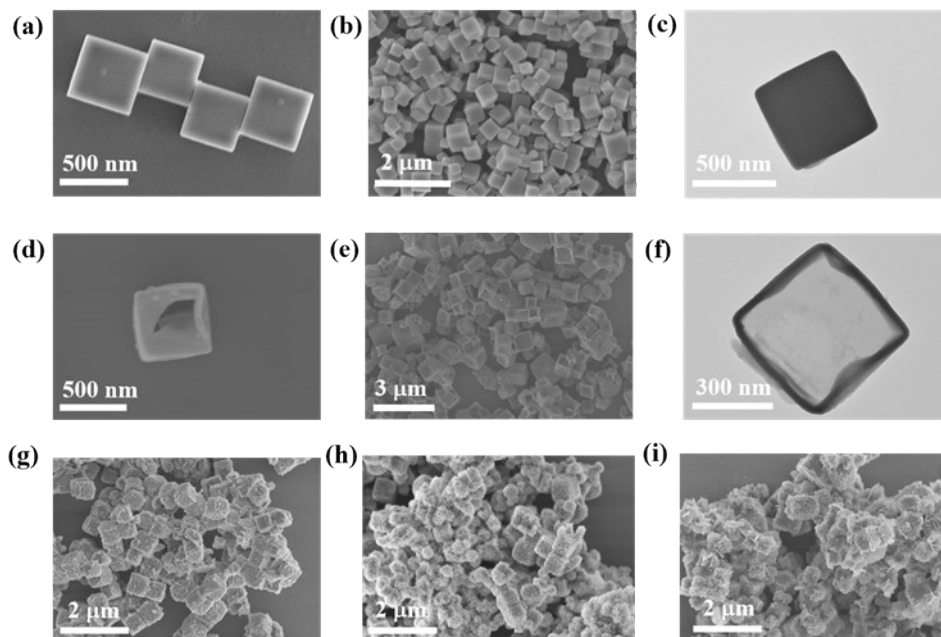

**Fig. S1.** (a,b) The different-sized SEM images of ZIF-67 NCs; (c) The TEM image of ZIF-67 NCs; (d,e) The different-sized SEM images of HZIF-1.2; (f) The TEM image of HZIF-1.2; (g) The SEM images of  $\text{Co}_3\text{O}_4\text{-HNC@NiCo-LDH-0.5}$  at low magnification; (h) The SEM images of  $\text{Co}_3\text{O}_4\text{-HNC@NiCo-LDH-1}$  at low magnification; (i) The SEM images of  $\text{Co}_3\text{O}_4\text{-HNC@NiCo-LDH-2}$  at low magnification.

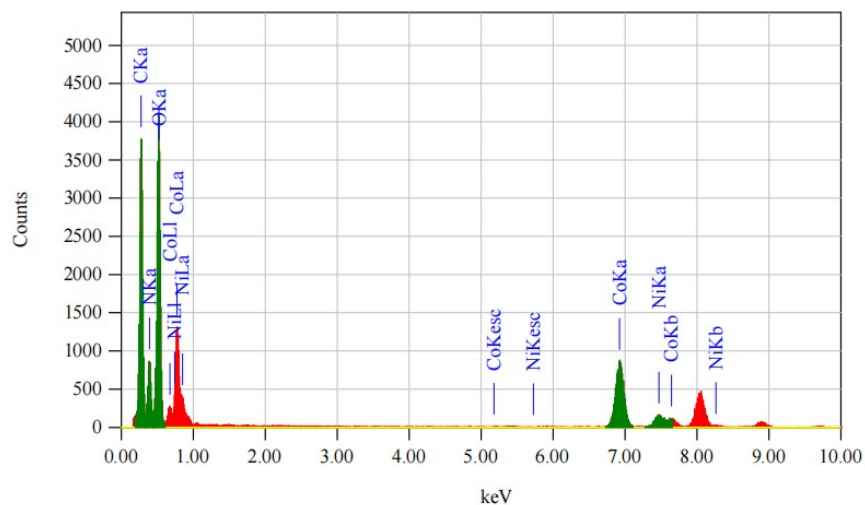

**Fig. S2.** The Energy spectrum of  $\text{Co}_3\text{O}_4\text{-HNC@NiCo-LDH-1}$ .

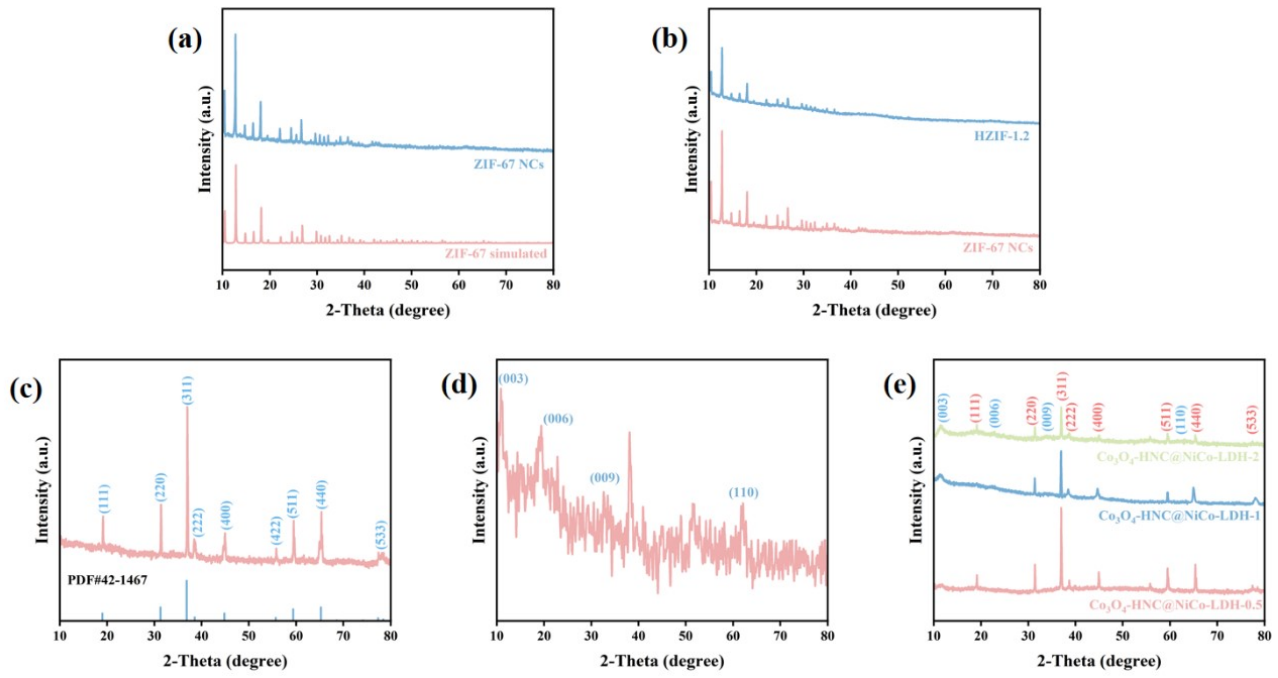

**Fig. S3.** The XRD patterns of (a) ZIF-67 NCs; (b) HZIF-1.2; (c)  $\text{Co}_3\text{O}_4$ -HNCs; (d) NiCo-LDH; (e)  $\text{Co}_3\text{O}_4$ -HNC@NiCo-LDH.

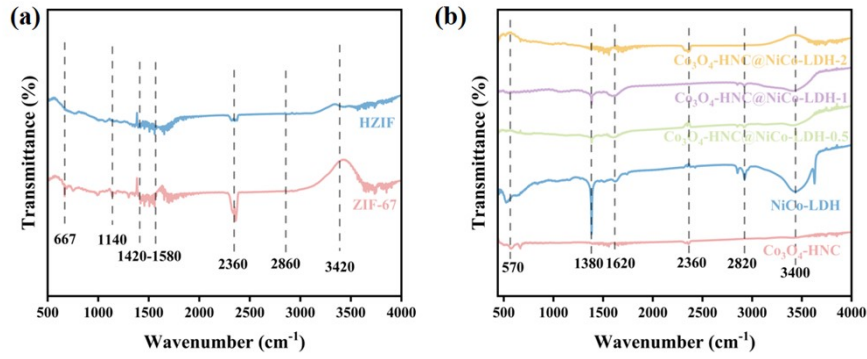

**Fig. S4.** FT-IR spectra of different samples. (a) ZIF-67 NCs and HZIF-1.2; (b)  $\text{Co}_3\text{O}_4$ -HNCs, NiCo-LDH,  $\text{Co}_3\text{O}_4$ -HNCs, and  $\text{Co}_3\text{O}_4$ -HNCs@NiCo-LDH.

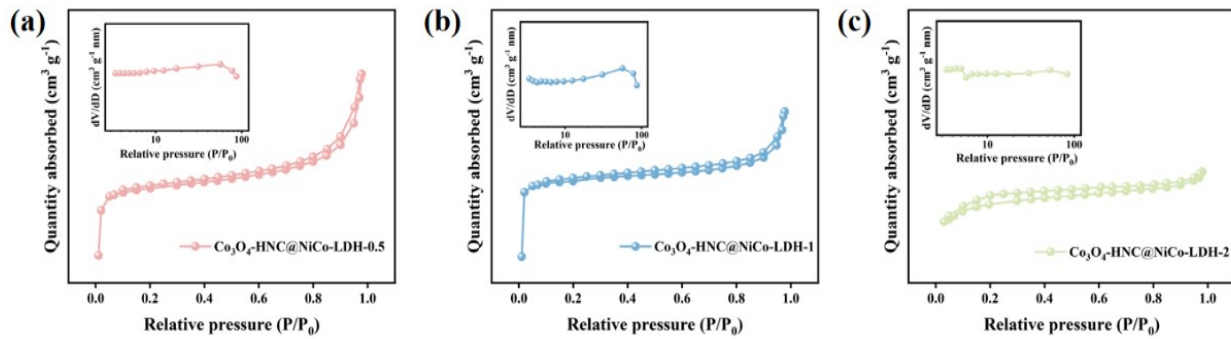

**Fig. S5.** The  $\text{N}_2$  adsorption-desorption isotherm loops and related pore size plots of (a)  $\text{Co}_3\text{O}_4$ -HNC@NiCo-LDH-0.5; (b)  $\text{Co}_3\text{O}_4$ -HNC@NiCo-LDH-1; (c)  $\text{Co}_3\text{O}_4$ -HNC@NiCo-LDH-2.

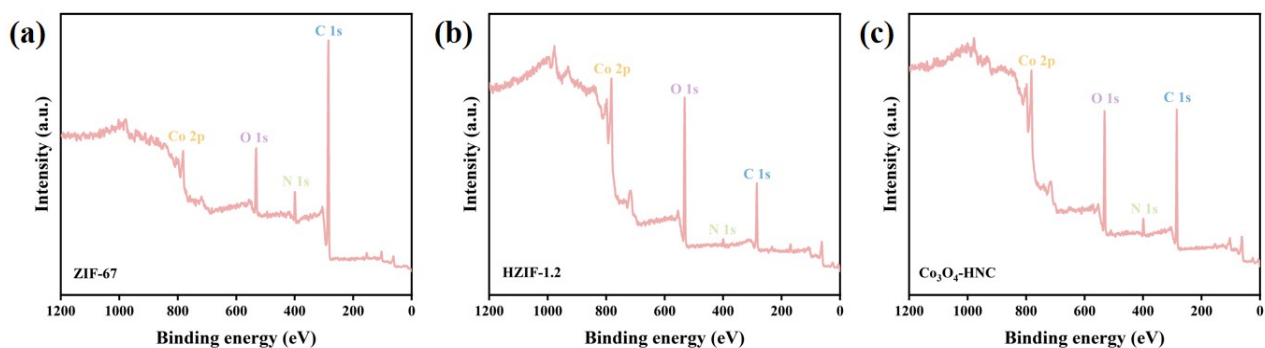

**Fig. S6.** The XPS survey spectra of (a) ZIF-67 NCs; (b) HZIF-1.2; (c)  $\text{Co}_3\text{O}_4\text{-HNC}$ s.

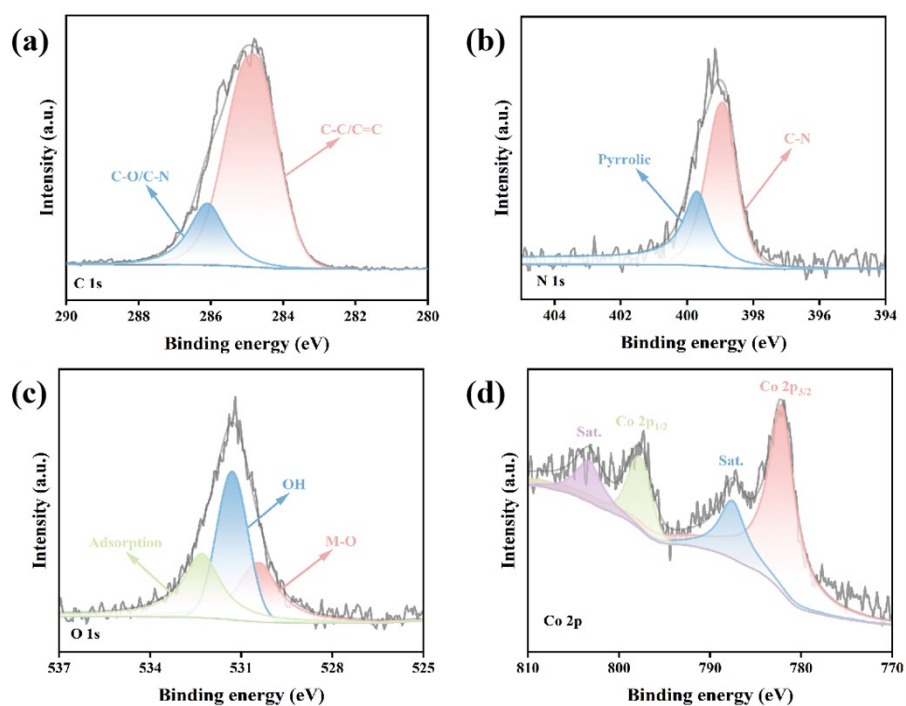

**Fig. S7.** (a-d) C 1s, N 1s, O 1s, and Co 2p spectra of the ZIF-67 NCs.

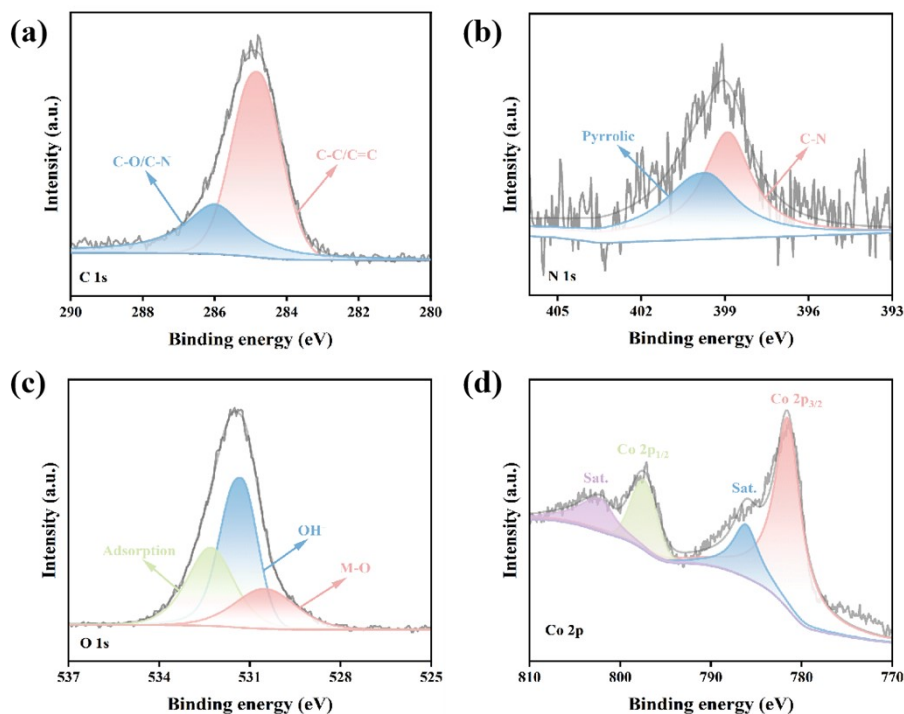

**Fig. S8.** (a-d) C 1s, N 1s, O 1s, and Co 2p spectra of the HZIF-1.2.

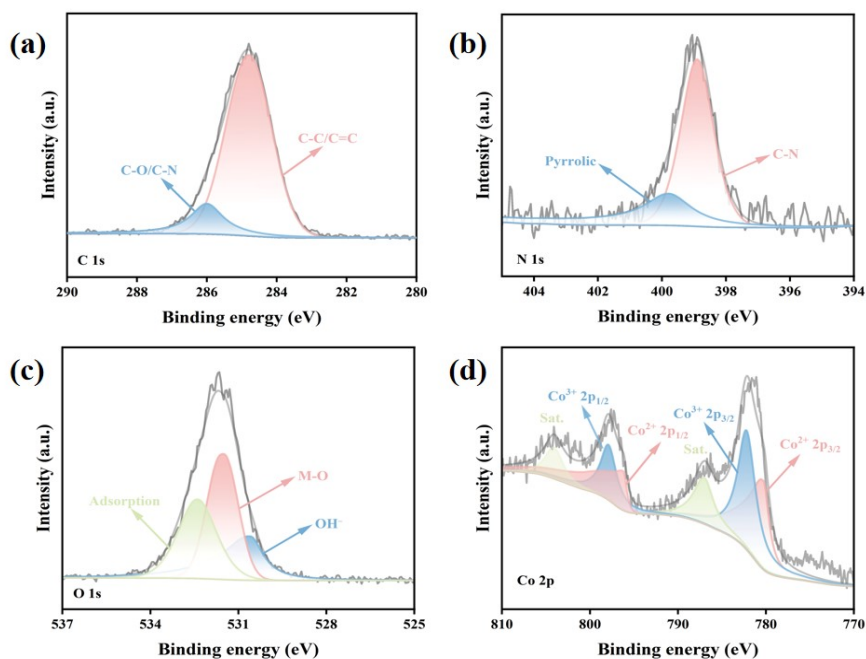

**Fig. S9.** (a-d) C 1s, N 1s, O 1s, and Co 2p spectra of the Co<sub>3</sub>O<sub>4</sub>-HNCs.

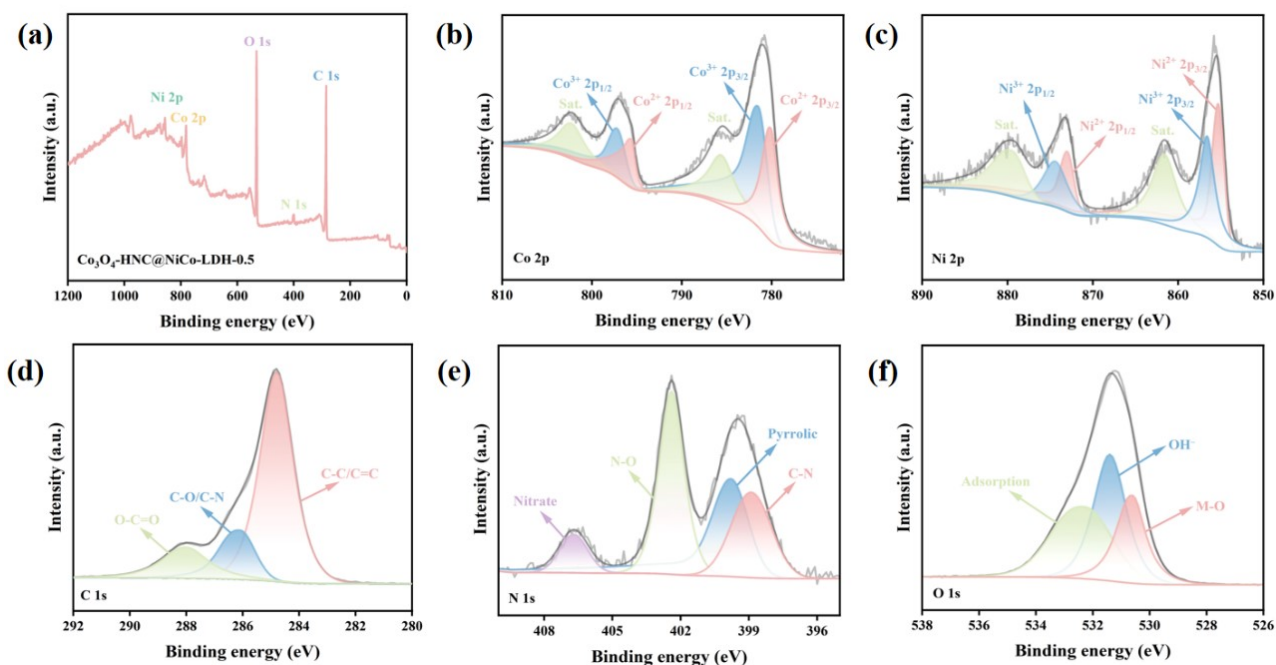

**Fig. S10.** (a) XPS survey spectra of the composites  $\text{Co}_3\text{O}_4\text{-HNC@NiCo-LDH-0.5}$ ; (c-f) Co 2p, Ni 2p, C 1s, N 1s, and O 1s spectra of the composites  $\text{Co}_3\text{O}_4\text{-HNC@NiCo-LDH-0.5}$ .

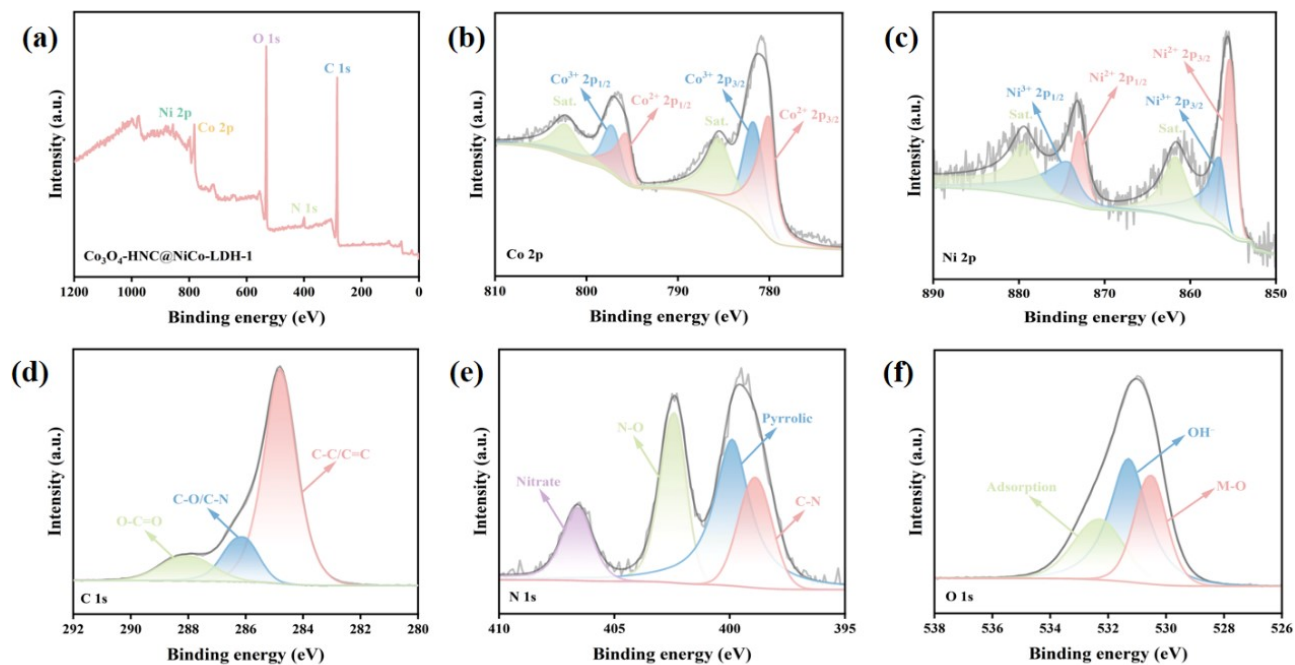

**Fig. S11.** (a) XPS survey spectra of the composites  $\text{Co}_3\text{O}_4\text{-HNC@NiCo-LDH-1}$ ; (c-f) Co 2p, Ni 2p, C 1s, N 1s, and O 1s spectra of the composites  $\text{Co}_3\text{O}_4\text{-HNC@NiCo-LDH-1}$ .



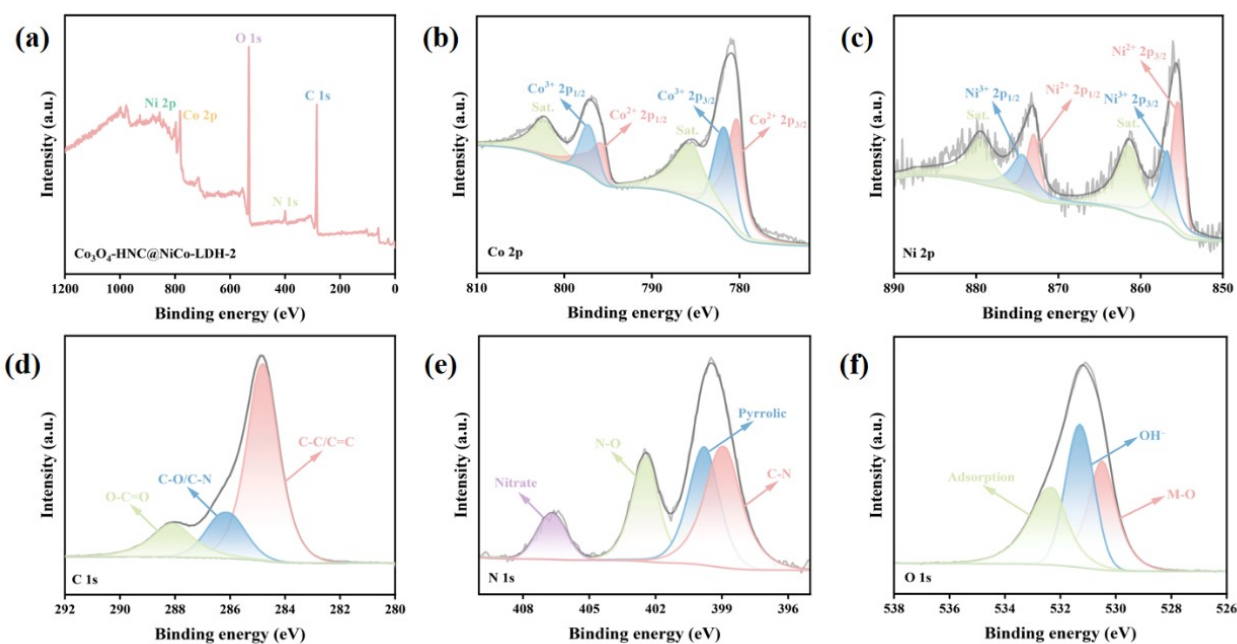

**Fig. S12.** (a) XPS survey spectra of the composites  $\text{Co}_3\text{O}_4\text{-HNC@NiCo-LDH-2}$ ; (c-f) Co 2p, Ni 2p, C 1s, N 1s, and O 1s spectra of the composites  $\text{Co}_3\text{O}_4\text{-HNC@NiCo-LDH-2}$ .

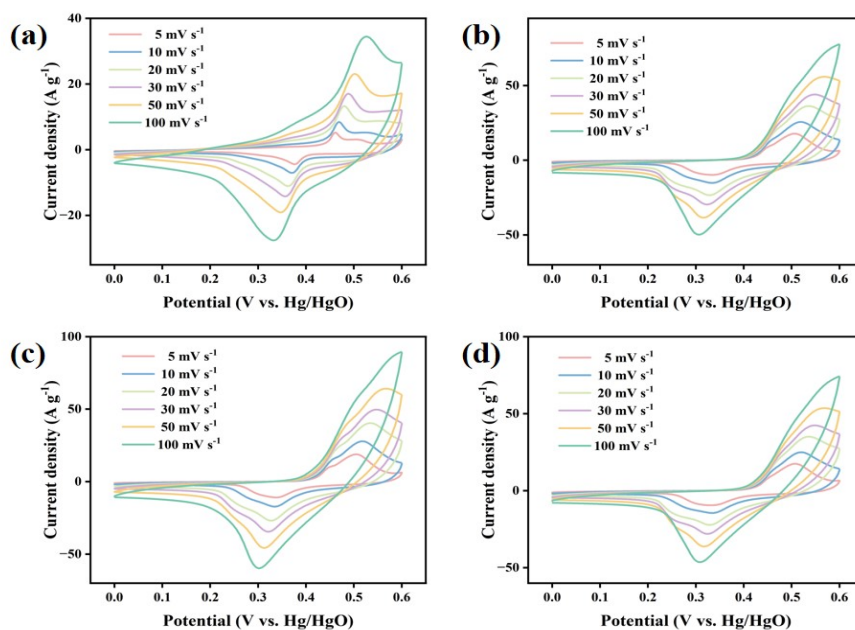

**Fig. S13.** CV of the (a) ZIF-67 NCs; (b) HZIF-0.9; (c) HZIF-1.2; (D) HZIF-1.5 at different scan rates.

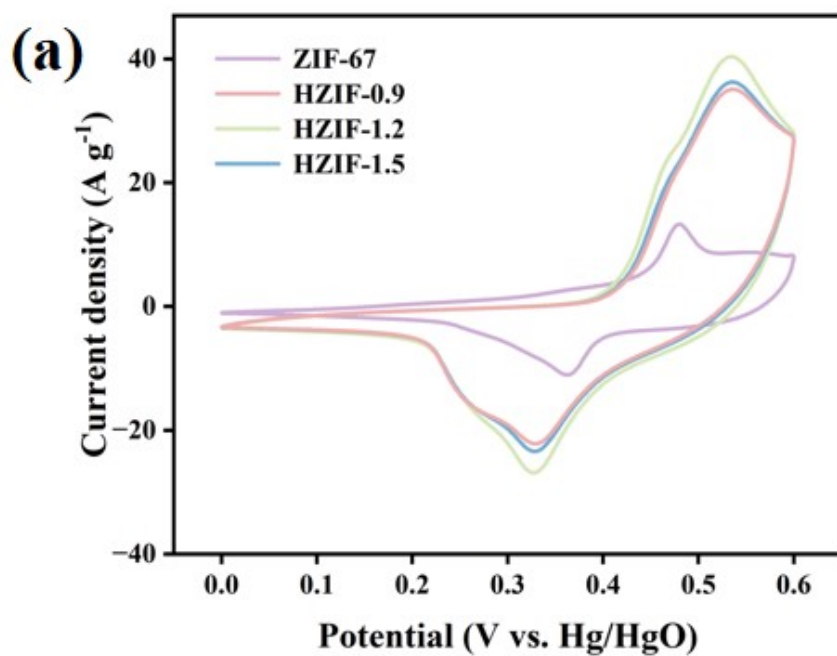

**Fig. S14.** Comparison of CV curves at a scan rate of  $20 \text{ mV s}^{-1}$ .

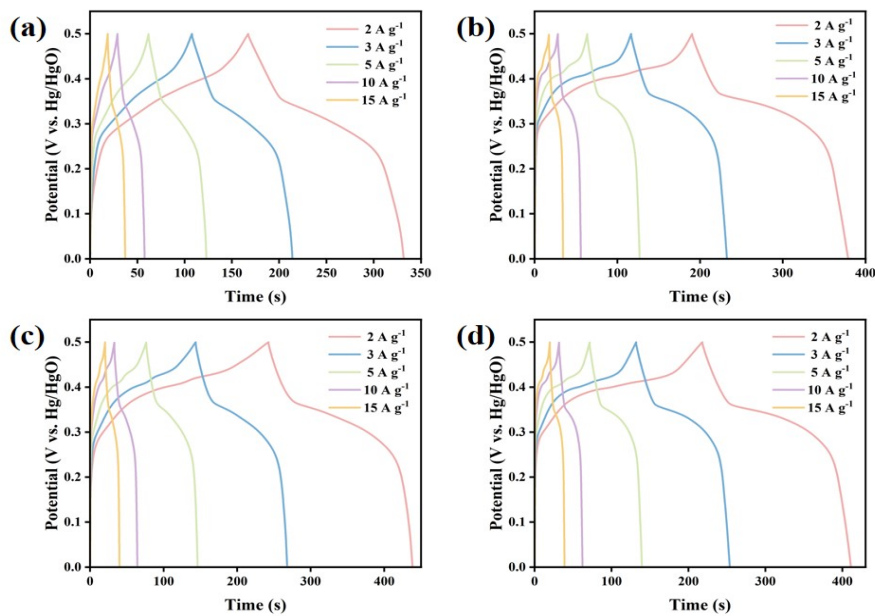

**Fig. S15.** GCD of the (a) ZIF-67 NCs; (b) HZIF-0.9; (c) HZIF-1.2; (d) HZIF-1.5 at different current densities.



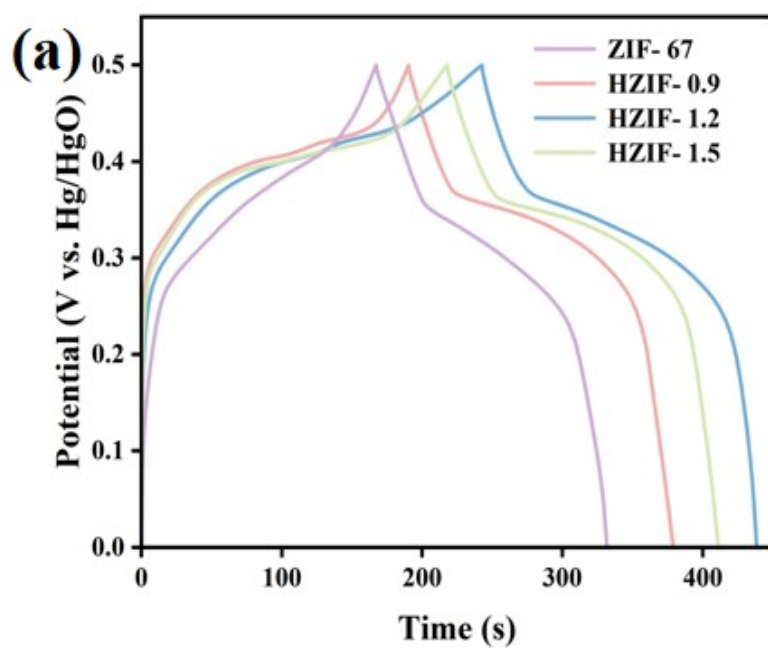

**Fig. S16.** Comparison of GCD curves at the current density of  $2 \text{ A g}^{-1}$ .

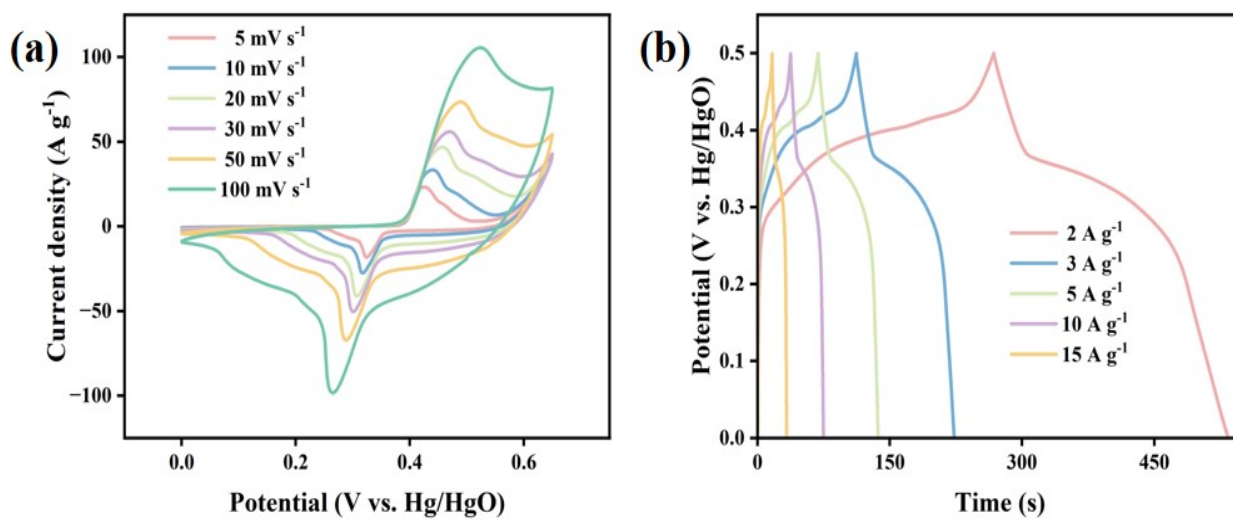

**Fig. S17.** (a) CV of the  $\text{Co}_3\text{O}_4$ -HNCs at different scan rates; (b) GCD of the  $\text{Co}_3\text{O}_4$ -HNCs at different current densities.

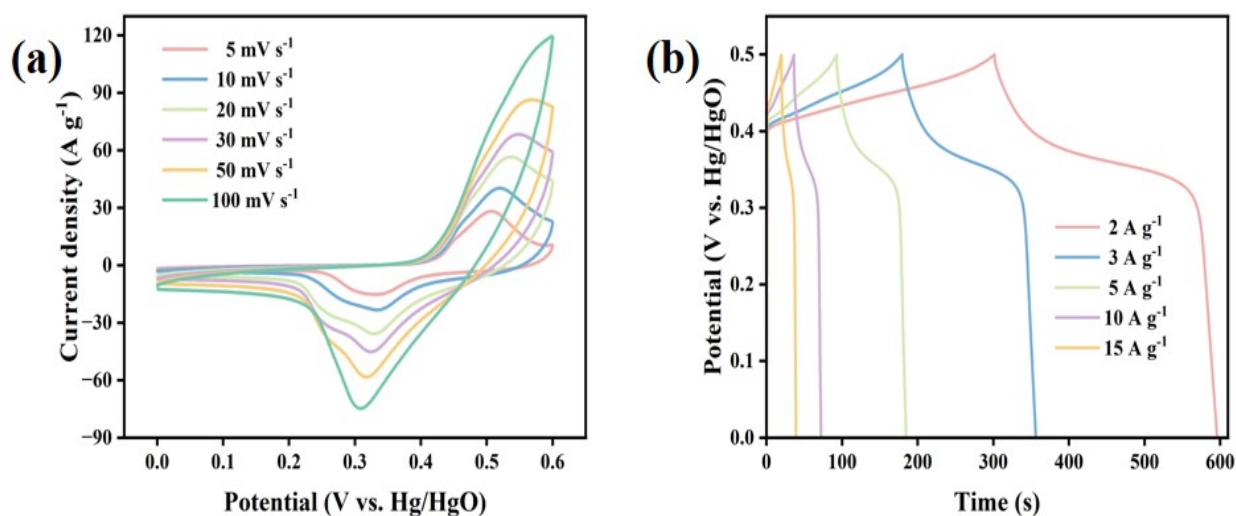

**Fig. S18.** (a) CV of the NiCo-LDH at different scan rates; (b) GCD of the NiCo-LDH at different current densities.

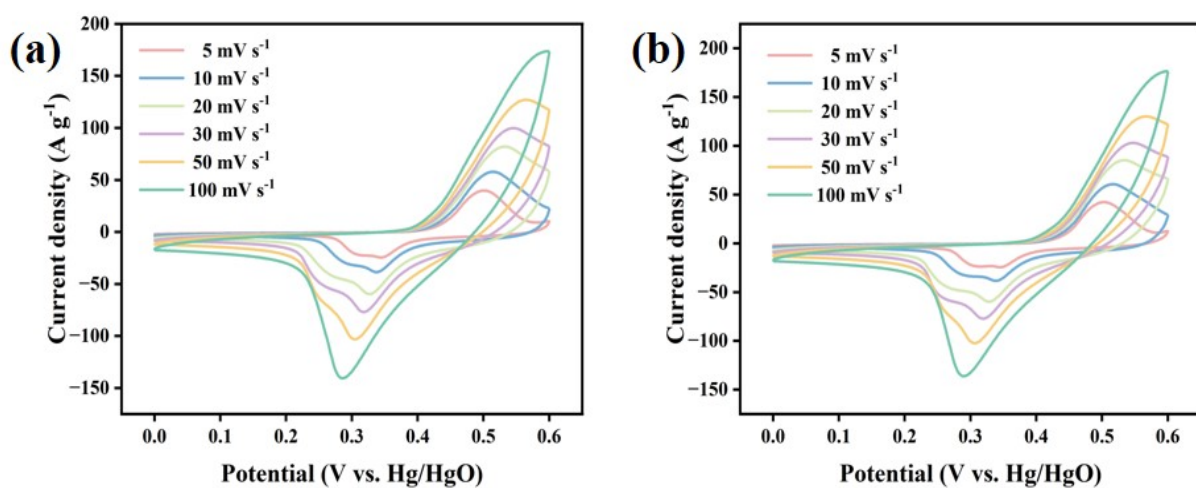

**Fig. S19.** CV of the (a) Co<sub>3</sub>O<sub>4</sub>-HNC@NiCo-LDH-0.5; (b) Co<sub>3</sub>O<sub>4</sub>-HNC@NiCo-LDH-2 at different scan rates.

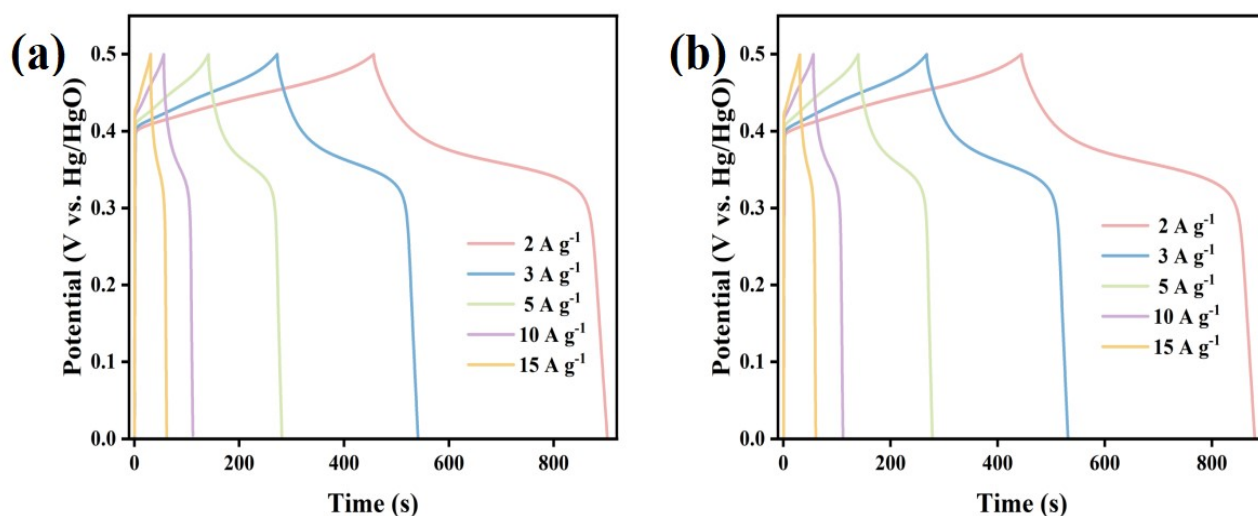

**Fig. S20.** GCD of the (a)  $\text{Co}_3\text{O}_4\text{-HNC@NiCo-LDH-0.5}$ ; (b)  $\text{Co}_3\text{O}_4\text{-HNC@NiCo-LDH-2}$  at different current densities.

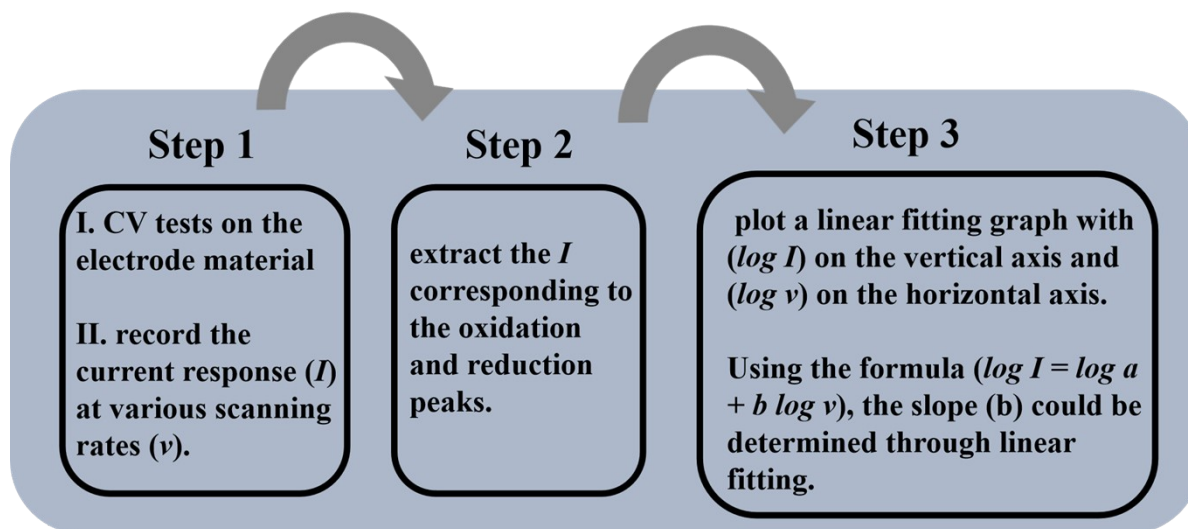

**Scheme S2** A simplified diagram of the calculation process for the b value.

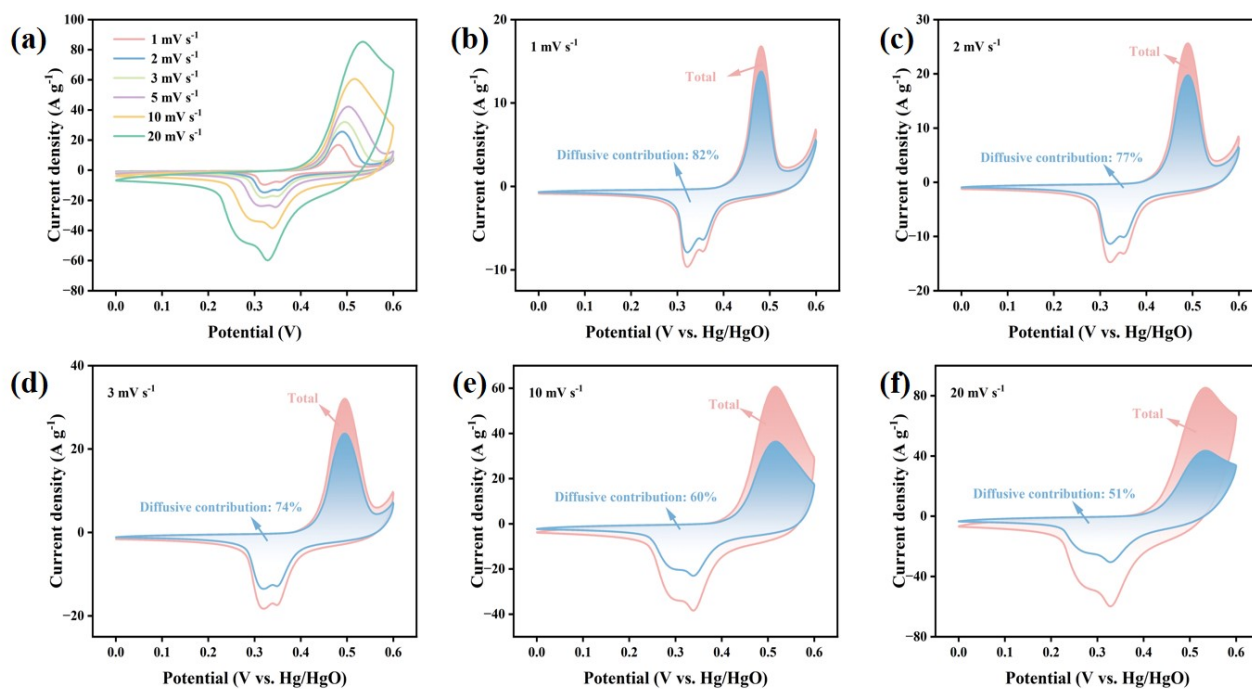

**Fig. S21.** (a) CV of the  $\text{Co}_3\text{O}_4\text{-HNC@NiCo-LDH-1}$  at 1-20  $\text{mV s}^{-1}$ ; (b-f) The area proportion diagrams of diffusion control at other sweep speeds.

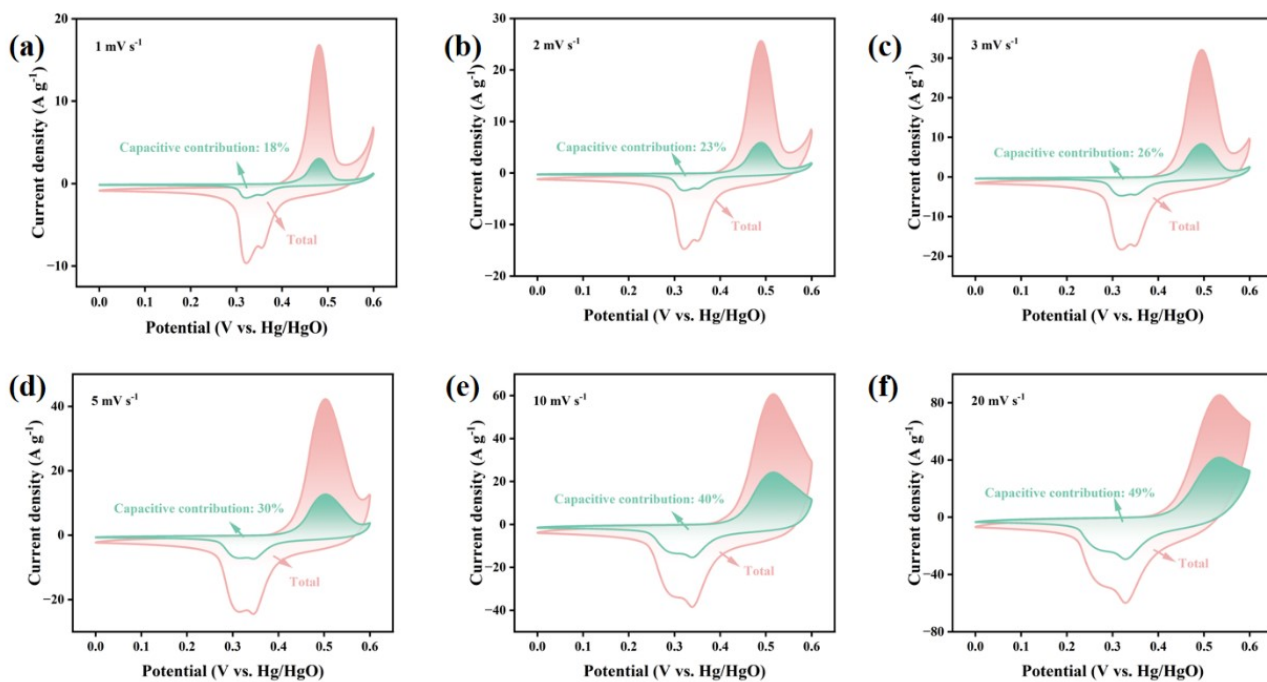

**Fig. S22.** (a-f) The area proportion diagrams of capacitive control at different sweep speeds.

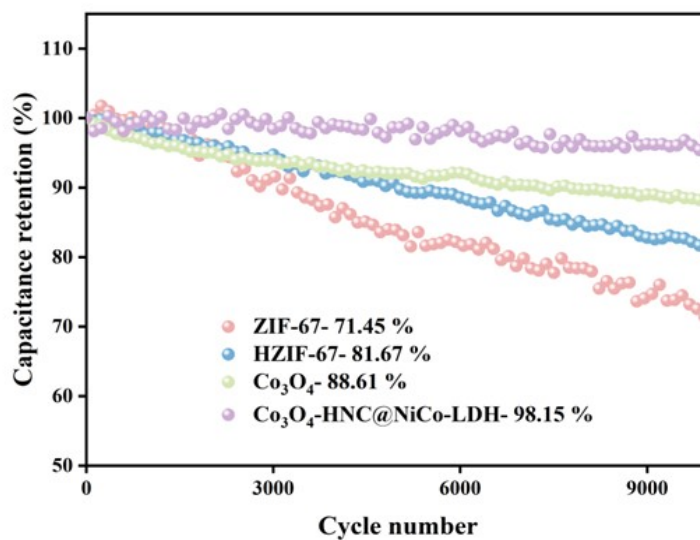

**Fig.S23.** Cycle performance comparison at 15A g<sup>-1</sup>.

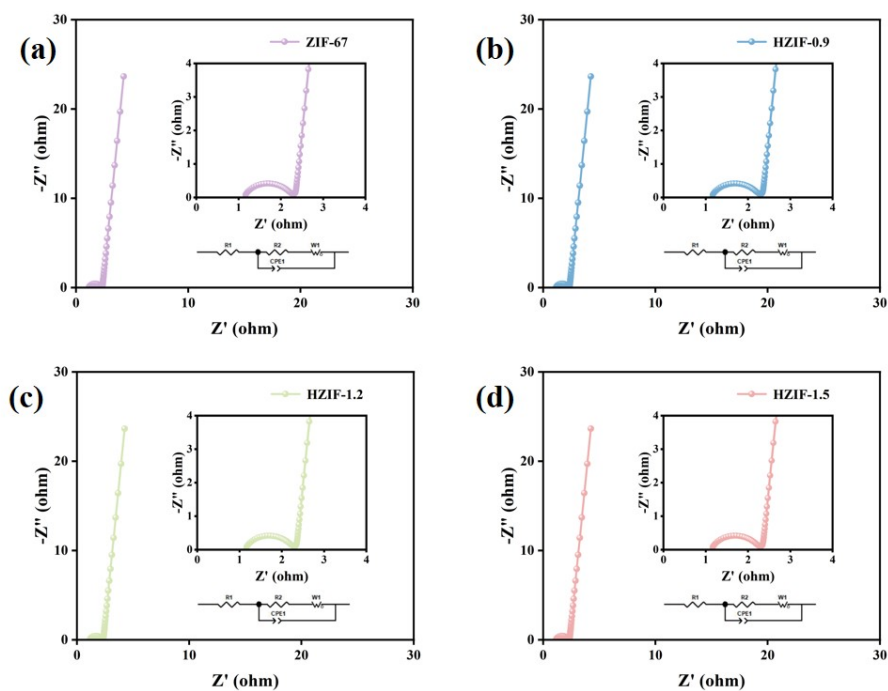

**Fig. S24.** Nyquist plots of (a) ZIF-67 NCs; (b) HZIF-0.9; (c) HZIF-1.2; (d) HZIF-1.5.

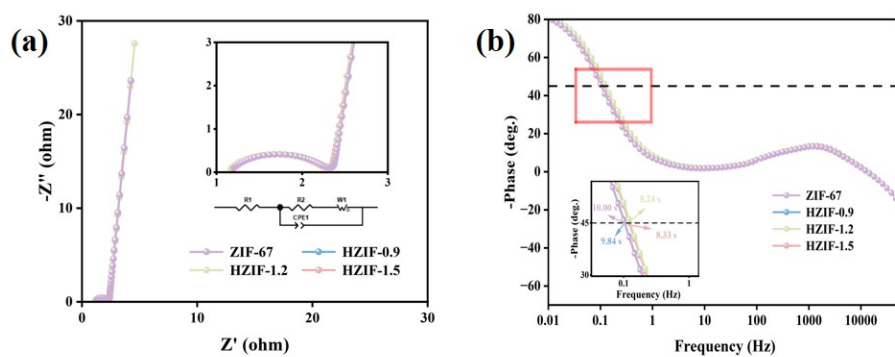

**Fig. S25.** ZIF and HZIF (a) Nyquist plots; (b) Bode plots of phase angle versus frequency.

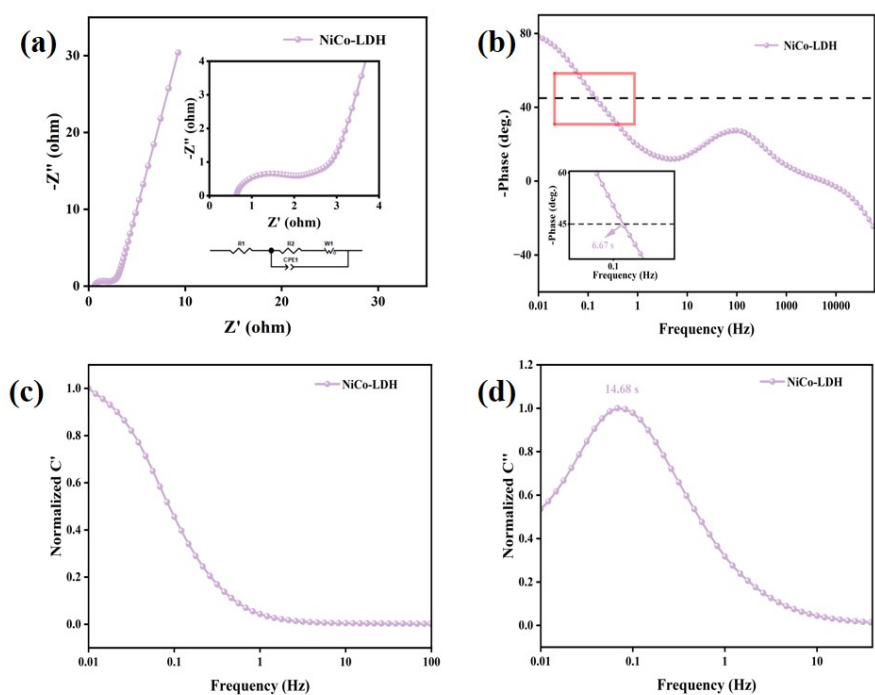

**Fig. S26.** NiCo-LDH (a) Nyquist plots; (b) Bode plots of phase angle versus frequency; The normalized real (c) and imaginary (d) part capacitance versus frequency.

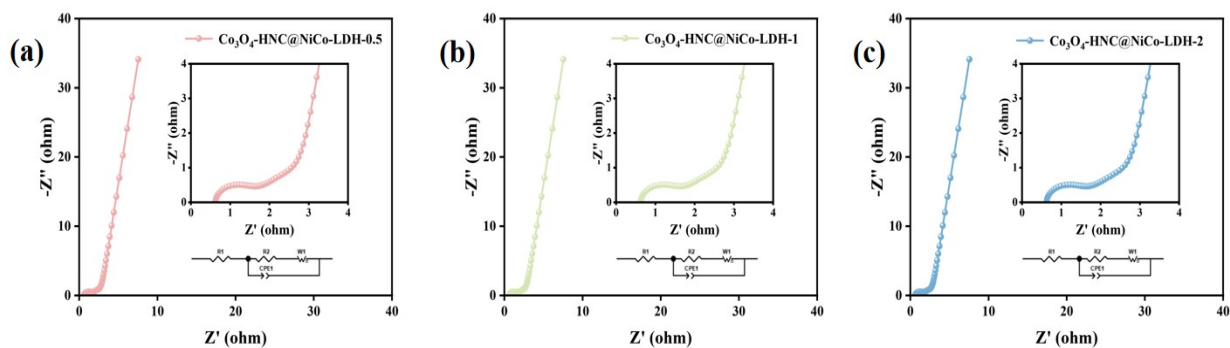

**Fig. S27.** Nyquist plots of (a)  $Co_3O_4$ -HNC@NiCo-LDH-0.5; (b)  $Co_3O_4$ -HNC@NiCo-LDH-1; (c)  $Co_3O_4$ -HNC@NiCo-LDH-2.



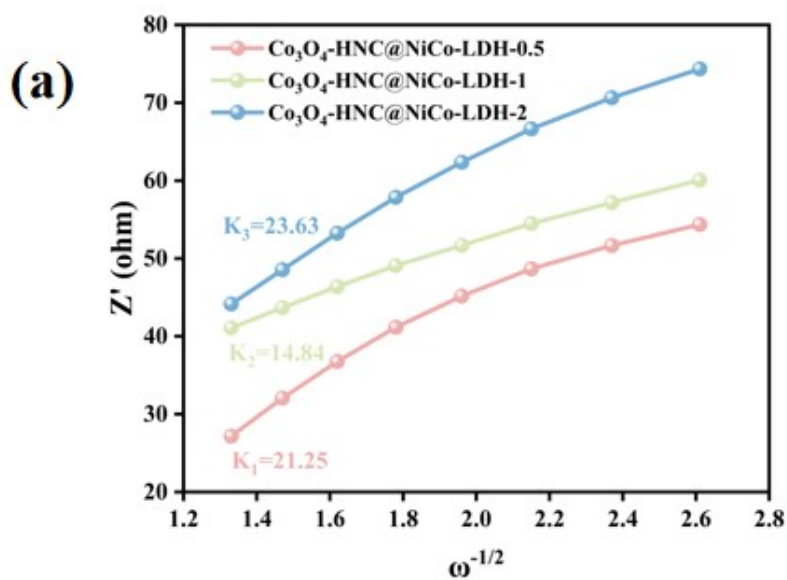

**Fig. S28.** Low-Frequency Warburg plots of  $\text{Co}_3\text{O}_4\text{-HNC@NiMn-LDH}$  electrodes.

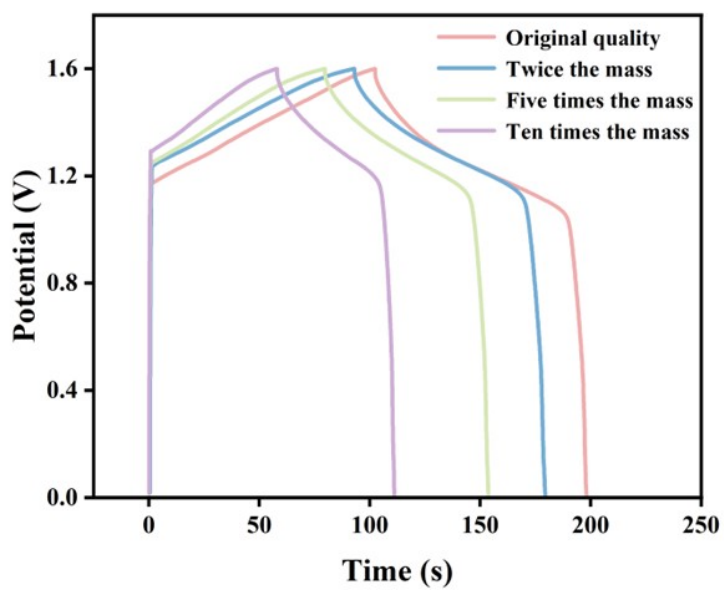

**Fig. S29.** High mass loading test.

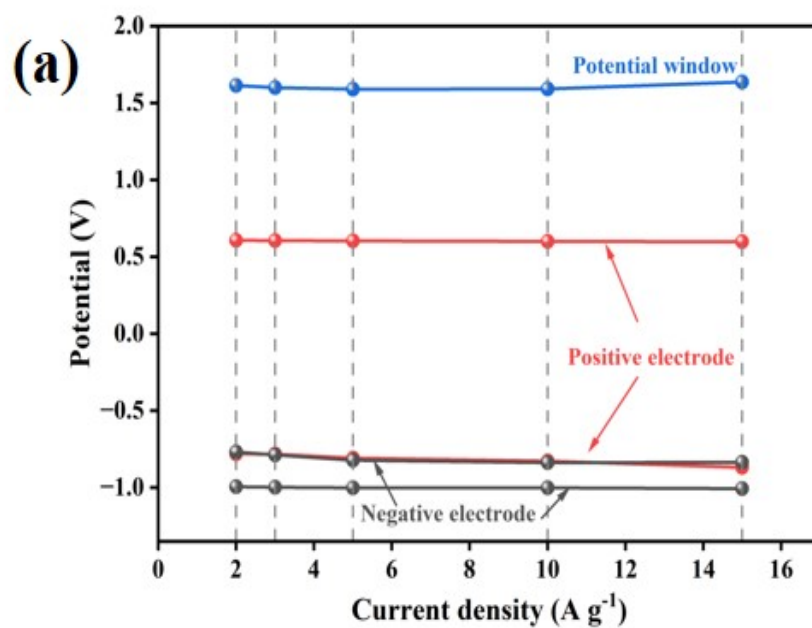

**Fig. S30.** The sum of the potential window provided by the positive electrode and negative material by the floating test at different current densities.

**Table S1.** The thickness of the LDH shell in Co<sub>3</sub>O<sub>4</sub>-HNC@NiCo-LDH.

| Sample                                           | Thickness of the LDH shell |
|--------------------------------------------------|----------------------------|
|                                                  | (nm)                       |
| Co <sub>3</sub> O <sub>4</sub> -HNC@NiCo-LDH-0.5 | 127                        |
| Co <sub>3</sub> O <sub>4</sub> -HNC@NiCo-LDH-1   | 138                        |
| Co <sub>3</sub> O <sub>4</sub> -HNC@NiCo-LDH-2   | 162                        |

**Table S2.** The proportion of elements of Co<sub>3</sub>O<sub>4</sub>-HNC@NiCo-LDH-1.

| Element | Series   | Mass<br>[%] | Counts   | Sigma | Atom<br>[%] |
|---------|----------|-------------|----------|-------|-------------|
| C       | K-Series | 45.15       | 18712.83 | 0.25  | 62.48       |
| N       | K-Series | 5.99        | 4220.74  | 0.10  | 7.11        |
| O       | K-Series | 21.98       | 21391.31 | 0.19  | 22.83       |
| Co      | K-Series | 24.68       | 12167.19 | 0.37  | 6.96        |
| Ni      | K-Series | 2.21        | 2095.57  | 0.08  | 0.63        |
| Total   | -----    | 100.00      | -----    | ----- | 100.00      |
